# Supplementary material for: Synthesis of novel coumarin–hydrazone hybrids as α-glucosidase inhibitors and their molecular docking studies
Source: Royal Society of Chemistry journal article supplement (doi:10.1039/d3ra03953f), 2023-01-01
Supplement: d3ra03953f1.pdf [file d3ra03953f1.pdf]

## Synthesis of novel coumarin-hydrazone hybrids as $\alpha$ -glucosidase inhibitors and their molecular docking studies

Hafiza Zara Tariq<sup>#a</sup>, Aamer Saeed<sup>a\*</sup>, Saeed Ullah<sup>b,c</sup>, Noor Fatima<sup>#a</sup> Sobia Ahsan Halim<sup>b</sup>,  
Ajmal Khan<sup>b</sup>, Hesham R El-Seedi<sup>g,h</sup>, Muhammad Zaman Ashrafi<sup>i</sup>, Muhammad Latif<sup>j</sup>, Ahmed  
Al-Harrasi<sup>b\*</sup>

<sup>a</sup> *Department of Chemistry, Quaid-i-Azam University, Islamabad 45320, Pakistan*

<sup>b</sup> *Natural and Medical Sciences Research Center, University of Nizwa, P.O. Box 33, PC 616,  
Birkat Al Mauz, Nizwa, Sultanate of Oman*

<sup>c</sup> *H.E.J. Research Institute of Chemistry, International Center for Chemical and Biological  
Sciences, University of Karachi, Karachi-75270, Pakistan*

<sup>g</sup> *School of Food and Biological Engineering, Jiangsu University, Zhenjiang 212013, China -*

<sup>h</sup> *Department of Chemistry, Faculty of Science, Menoufia University, Shebin El-Kom 32512,  
Egypt*

<sup>i</sup> *Department of Chemistry, Allama Iqbal Open University Islamabad, Pakistan*

<sup>j</sup> *Centre for Genetics and Inherited Diseases (CGID), Taibah University Al-Madinah Al-  
Munawwarah, Kingdom of Saudi Arabia*

<sup>#</sup> *Both authors contributed equally*

### \* Address for Correspondence

Prof. Dr. Aamer Saeed. Email: [asaheed@qau.edu.pk](mailto:asaheed@qau.edu.pk), Tel: +92-51-9064-2128

Prof. Dr. Ahmed Al-Harrasi, [aharrasi@unizwa.edu.om](mailto:aharrasi@unizwa.edu.om)

# $^1\text{H}$ -NMR and $^{13}\text{C}$ -NMR Spectra of 7a

Dr. Ajmal / Bu-2 / CDCl<sub>3</sub>  
C13CPD

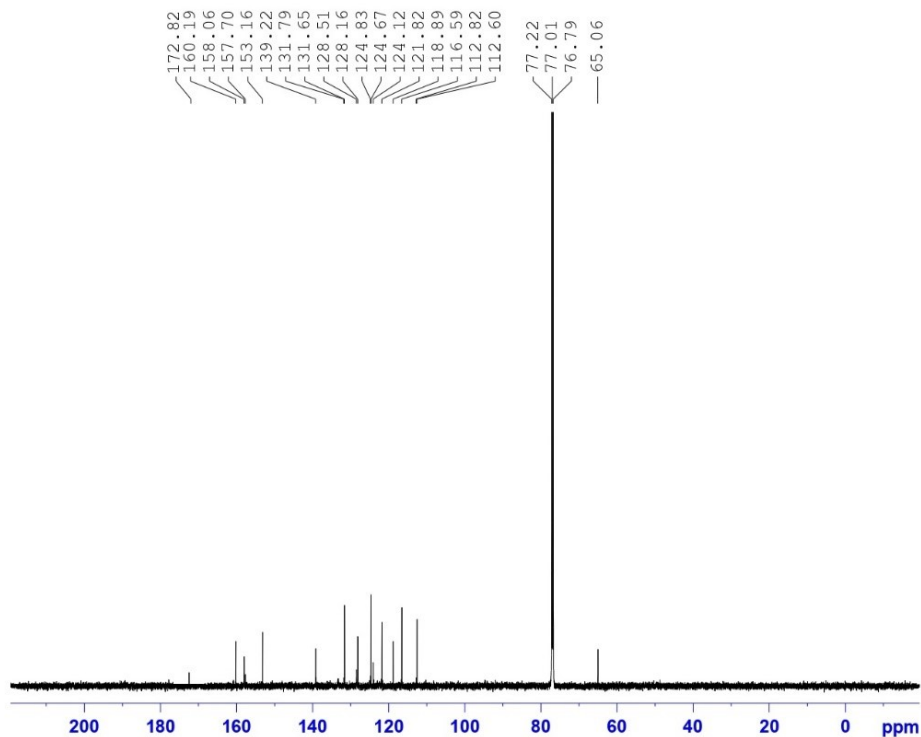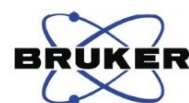

```

Current Data Parameters
NAME      18-July-2023
EXPNO     17
PROCNO    1

F2 - Acquisition Parameters
Date_     20230718
Time      16.52
INSTRUM   spect
PROBHD    5 mm PABBO BB/
PULPROG   zgpg30
TD         65536
SOLVENT   CDCl3
NS         4454
DS         4
SWH        36057.691 Hz
FIDRES     0.350197 Hz
AQ         0.9087659 sec
RG         195.2
CW         13.867 usec
DE         6.50 usec
TE         298.1 K
D1         2.00000000 sec
D11        0.03000000 sec
TD0        1

===== CHANNEL f1 =====
SFO1      150.9229276 MHz
NUC1       13C
P1         11.60 usec
PLW1       83.00000000 W

===== CHANNEL f2 =====
SFO2      600.1524006 MHz
NUC2       1H
CPDPRG2   waltz16
PCPD2     70.00 usec
PLWC      22.60000038 W
PLW12     0.52806002 W
PLW13     0.23874999 W

F2 - Processing parameters
SI         32768
SF         150.9078399 MHz
WDW        EM
SSB        0
LB         1.00 Hz
GB         0
PC         1.40
    
```

Dr. Ajmal/Bu-2/DMSO  
PROTON

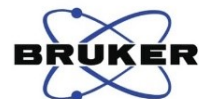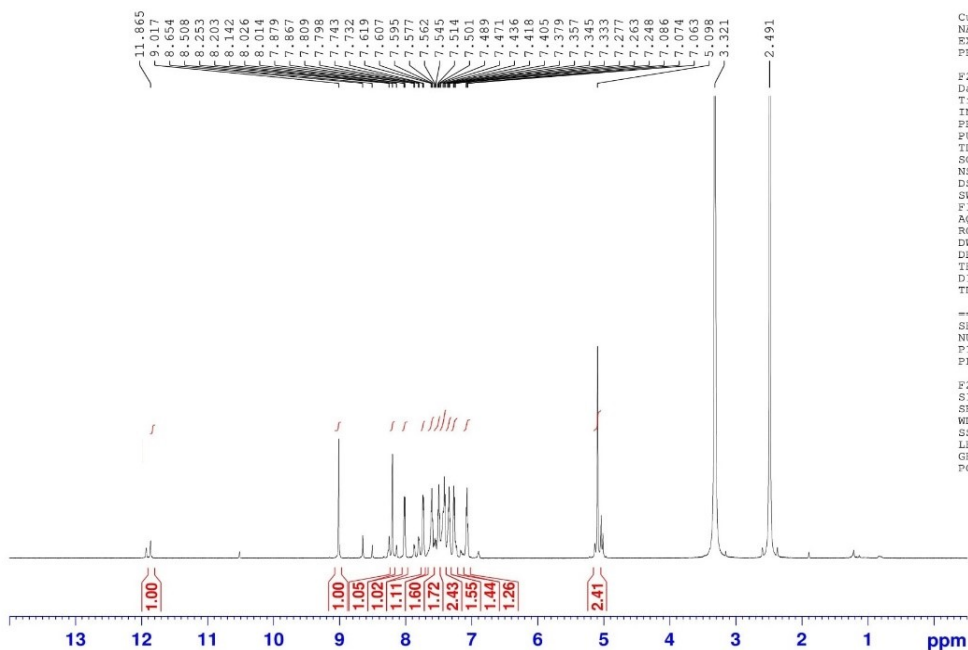

Current Data Parameters  
NAME 23-July-2021\_Dr. Ajmal  
EXPNO 71  
PROCNO 1

F2 - Acquisition Parameters  
Date\_ 20210726  
Time 12.46  
INSTRUM spect  
PROBHD 5 mm PABBO BB/  
PULPROG zg30  
TD 65536  
SOLVENT DMSO  
NS 16  
DS 2  
SWH 12019.230 Hz  
FIDRES 0.183399 Hz  
AQ 2.7262976 sec  
RG 86.85  
DW 41.600 usec  
DE 6.50 usec  
TE 298.2 K  
D1 1.00000000 sec  
TD0 1

===== CHANNEL f1 =====  
SF01 600.1537062 MHz  
NUC1 1H  
P1 10.90 usec  
PLW1 22.60000038 W

F2 - Processing parameters  
SI 65536  
SF 600.1500107 MHz  
WDW EM  
SSB 0  
LB 0.30 Hz  
GB 0  
PC 1.00

# <sup>1</sup>H-NMR and <sup>13</sup>C-NMR Spectra of 7b

Dr. Ajmal/Bu-3/DMSO  
PROTON

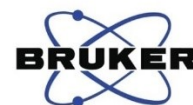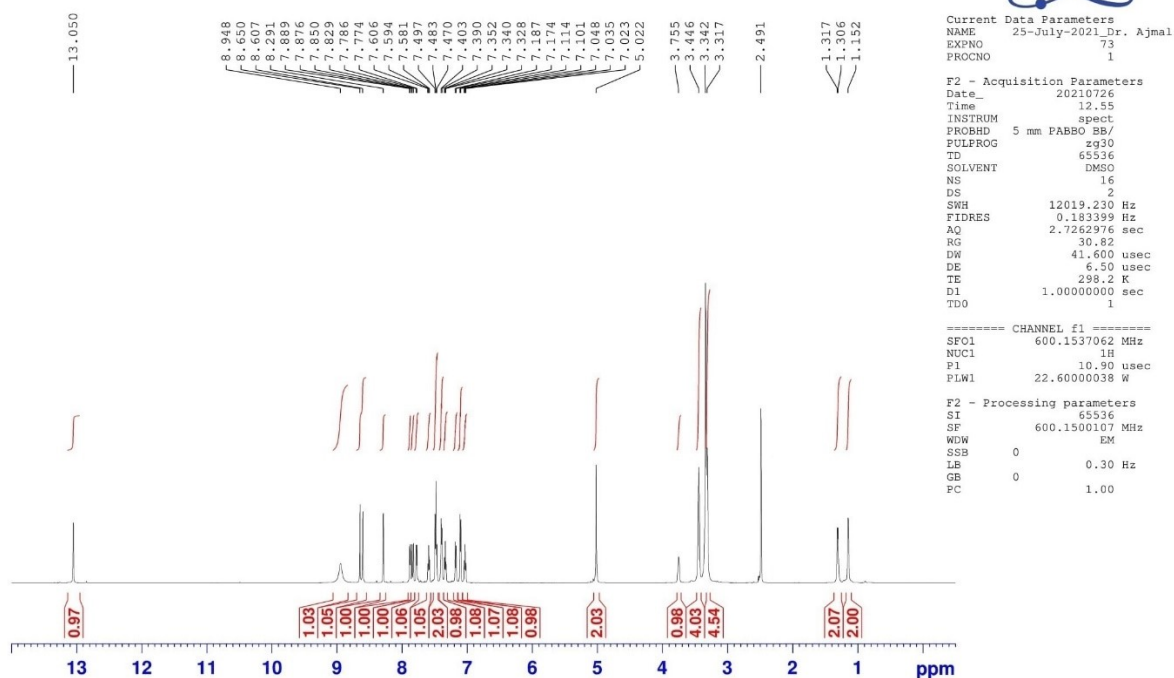

Dr. Ajmal/Bu-3/DMSO  
C13CPD

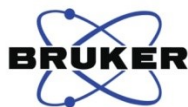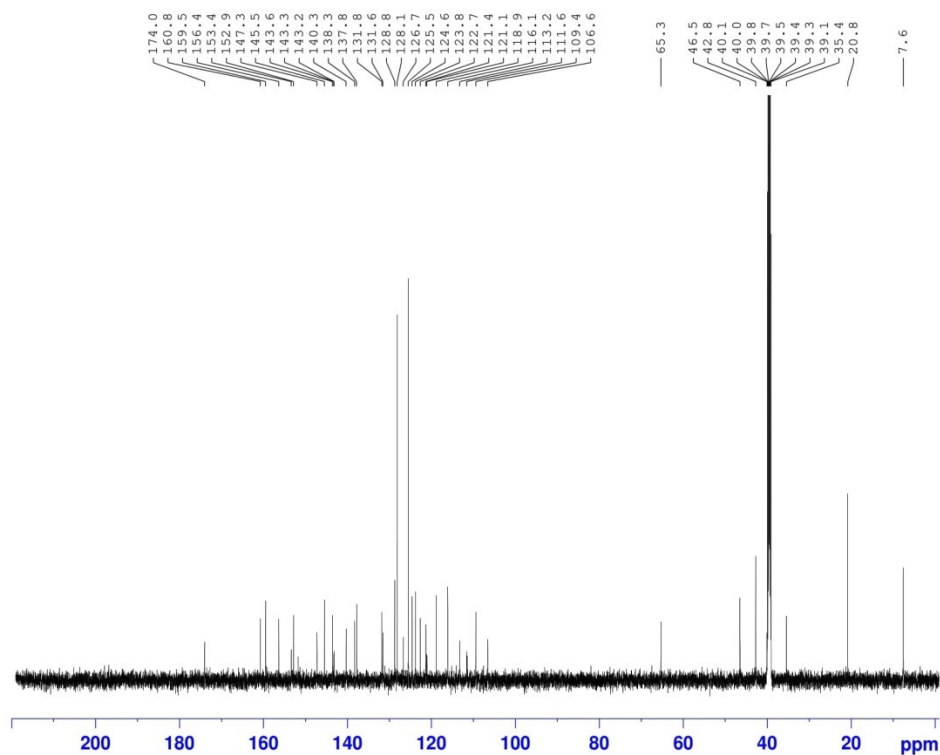

Current Data Parameters  
NAME 25-July-2021\_Dr. Ajmal  
EXPNO 74  
PROCNO 1

F2 - Acquisition Parameters  
Date\_ 20210726  
Time 12.57  
INSTRUM spect  
PROBHD 5 mm PABBO BB/  
PULPROG zgpg30  
TD 32768  
SOLVENT DMSO  
NS 256  
DS 4  
SWH 36057.691 Hz  
FIDRES 1.100393 Hz  
AQ 0.4543829 sec  
RG 195.2  
DW 13.867 usec  
DE 6.50 usec  
TE 298.1 K  
D1 2.00000000 sec  
D11 0.03000000 sec  
TD0 1

===== CHANNEL f1 =====  
SFO1 150.922976 MHz  
NUC1 13C  
P1 11.60 usec  
PLW1 83.00000000 W

===== CHANNEL f2 =====  
SFO2 600.1524006 MHz  
NUC2 1H  
CPDPRG[2] waltz16  
PCPD2 70.00 usec  
PLW2 22.60000039 W  
PLW12 0.52806002 W  
PLW13 0.25874999 W

F2 - Processing parameters  
SI 32768  
SF 150.9079041 MHz  
WDW EM  
SSB 0  
LB 1.00 Hz  
GB 0  
PC 1.40

**$^1\text{H}$ -NMR and  $^{13}\text{C}$ -NMR Spectra of 7c**

Dr. Ajmal/Bu-4/DMSO  
PROTON

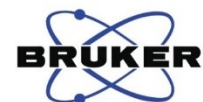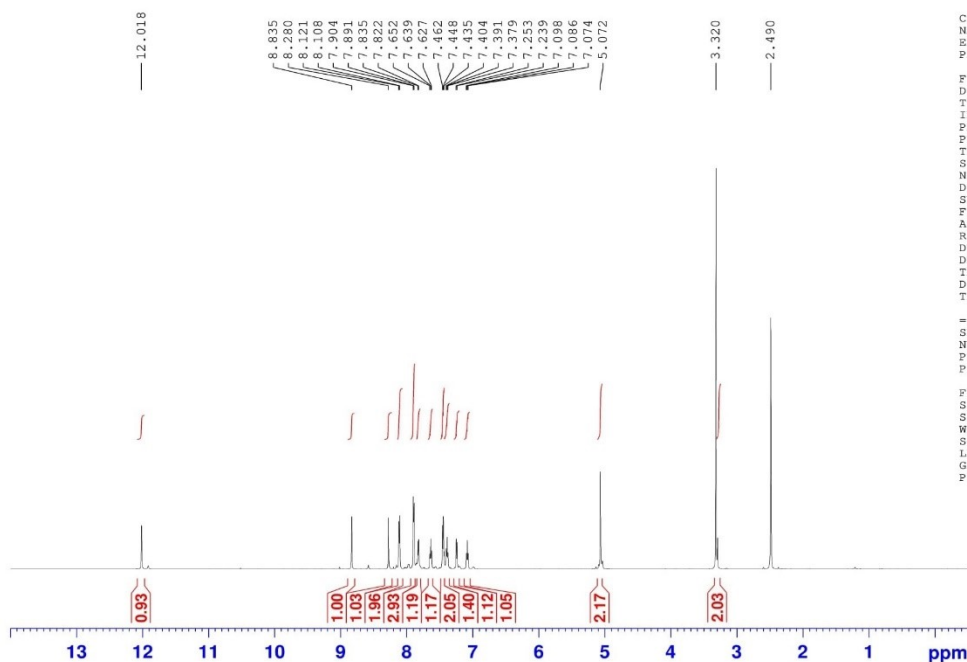

Current Data Parameters  
NAME 25-July-2021\_Dr. Ajmal  
EXPNO 89  
PROCNO 1

F2 - Acquisition Parameters  
Date\_ 20210726  
Time 15.35  
INSTRUM spect  
PROBHD 5 mm PABBO BB/  
PULPROG zg30  
TD 65536  
SOLVENT DMSO  
NS 16  
DS 2  
SWH 12019.230 Hz  
FIDRES 0.183399 Hz  
AQ 2.7262976 sec  
RG 86.85  
DW 41.600 usec  
DE 6.50 usec  
TE 298.1 K  
D1 1.00000000 sec  
TD0 1

----- CHANNEL f1 -----  
SF01 600.1537062 MHz  
NUC1 1H  
P1 10.90 usec  
PLW1 22.60000038 W

F2 - Processing parameters  
SI 65536  
SF 600.1500107 MHz  
WDW EM  
SSB 0  
LB 0.30 Hz  
GB 0  
PC 1.00

Dr. Ajmal/Bu-4/DMSO  
C13CPD

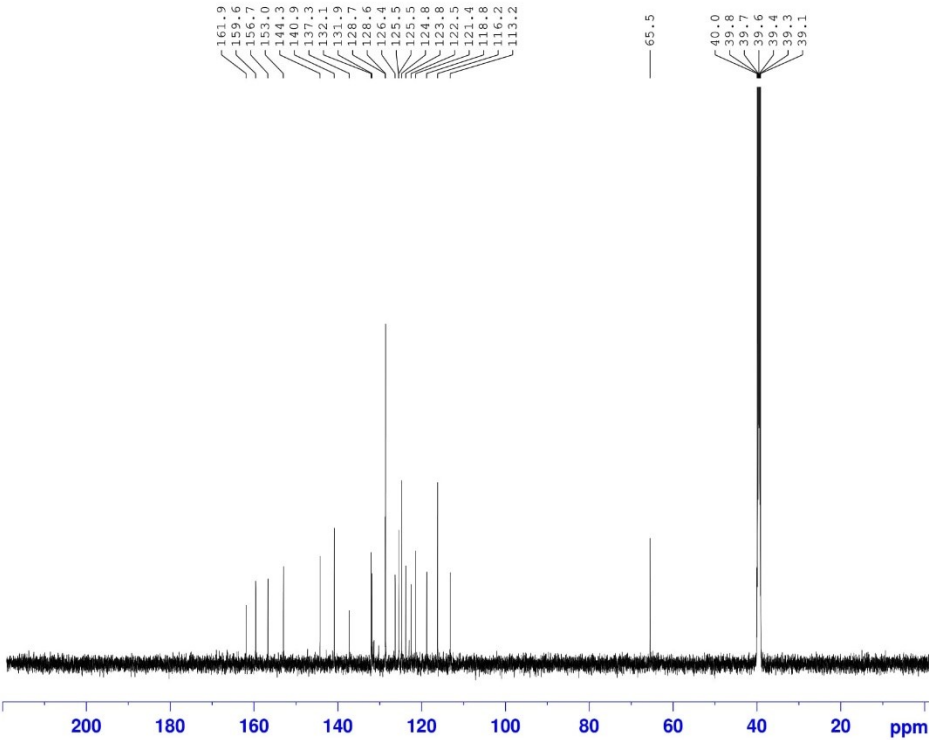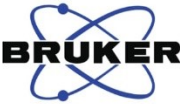

Current Data Parameters  
NAME 25-July-2021\_Dr. Ajmal  
EXPNO 90  
PROCNO 1

F2 - Acquisition Parameters  
Date\_ 20210726  
Time 16.18  
INSTRUM spect  
PROBHD 5 mm PABBO BB/  
PULPROG zgpg30  
TD 32768  
SOLVENT DMSO  
NS 1024  
DS 4  
SWH 36057.693 Hz  
FIDRES 1.100393 Hz  
AQ 0.4543829 sec  
RG 195.2  
DW 13.867 usec  
DE 6.50 usec  
TE 298.2 K  
D1 2.00000000 sec  
D11 0.03000000 sec  
TD0 1

===== CHANNEL f1 =====  
SF01 150.9229276 MHz  
NUC1 13C  
P1 11.60 usec  
PLW1 83.00000000 W

===== CHANNEL f2 =====  
SF02 600.1524006 MHz  
NUC2 1H  
CPDPRG2 waltz16  
PCPD2 70.00 usec  
PLW2 22.60000038 W  
PLW12 0.52806002 W  
PLW13 0.25874999 W

F2 - Processing parameters  
SI 32768  
SF 150.9079041 MHz  
WDW EM  
SSB 0  
LB 1.00 Hz  
GB 0  
PC 1.40

## **$^1\text{H}$ -NMR and $^{13}\text{C}$ -NMR Spectra of 7d**



Dr. Ajmal/Bu-7/DMSO  
PROTON

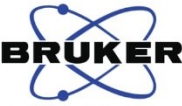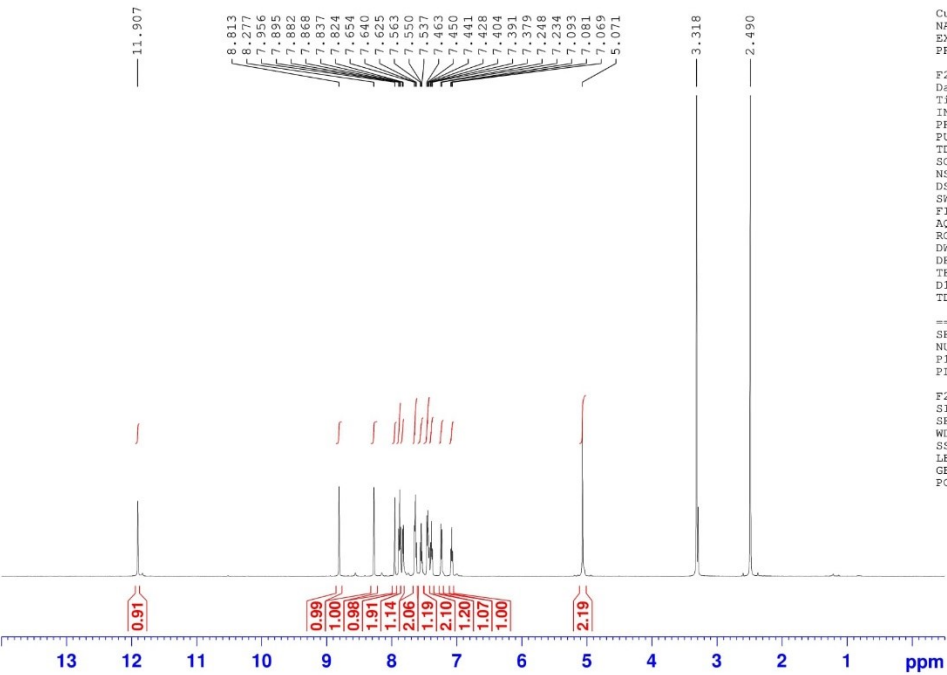

Current Data Parameters  
NAME 25-July-2021\_Dr. Ajmal  
EXPNO 61  
PROCNO 1

F2 - Acquisition Parameters  
Date\_ 20210726  
Time 9.40  
INSTRUM spect  
PROBHD 5 mm PABBO BB/  
PULPROG zg30  
TD 65536  
SOLVENT DMSO  
NS 16  
DS 2  
SWH 12019.230 Hz  
FIDRES 0.183399 Hz  
AQ 2.7262976 sec  
RG 86.85  
DW 41.600 usec  
DE 6.50 usec  
TE 298.1 K  
D1 1.00000000 sec  
TD0 1

===== CHANNEL f1 =====  
SF01 600.1537062 MHz  
NUC1 1H  
P1 10.90 usec  
PLW1 22.60000038 W

F2 - Processing parameters  
SI 65536  
SF 600.1500107 MHz  
WDW EM  
SSB 0  
LB 0.30 Hz  
GB 0  
PC 1.00

Dr. Ajmal/Bu-7/DMSO  
C13CPD

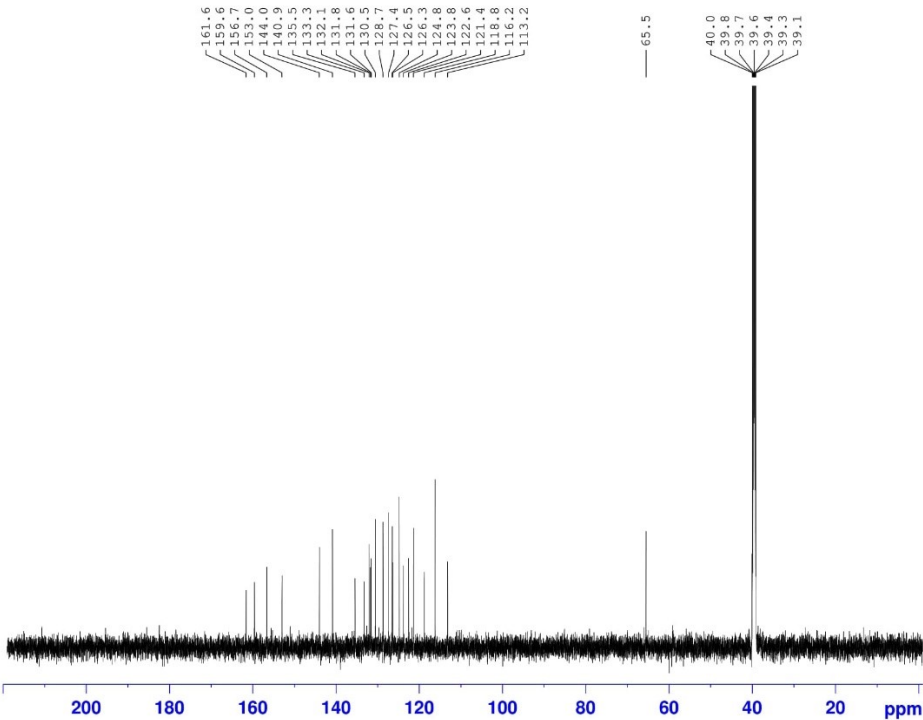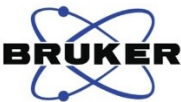

Current Data Parameters  
NAME 25-July-2021\_Dr. Ajmal  
EXPNO 62  
PROCNO 1

F2 - Acquisition Parameters  
Date\_ 20210726  
Time 9.44  
INSTRUM spect  
PROBHD 5 mm PABBO BB/  
PULPROG zgpg30  
TD 32768  
SOLVENT DMSO  
NS 512  
DS 4  
SWH 36057.691 Hz  
FIDRES 1.100393 Hz  
AQ 0.4543823 sec  
RG 195.2  
DW 13.867 usec  
DE 6.50 usec  
TE 298.2 K  
D1 2.00000000 sec  
D11 0.03000000 sec  
TD0 1

===== CHANNEL f1 =====  
SFO1 150.9229276 MHz  
NUC1 13C  
P1 11.60 usec  
PLW1 83.00000000 W

===== CHANNEL f2 =====  
SFO2 600.1524006 MHz  
NUC2 1H  
CPDPRG2 waltz16  
PCPD2 70.00 usec  
PLW2 22.60000038 W  
PLW12 0.52806002 W  
PLW13 0.25874999 W

F2 - Processing parameters  
SI 32768  
SF 150.9079041 MHz  
WDW EM  
SSB 0  
LB 1.00 Hz  
GB 0  
PC 1.40

Dr. Ajmal/Bu-8/DMSO  
PROTON

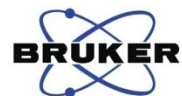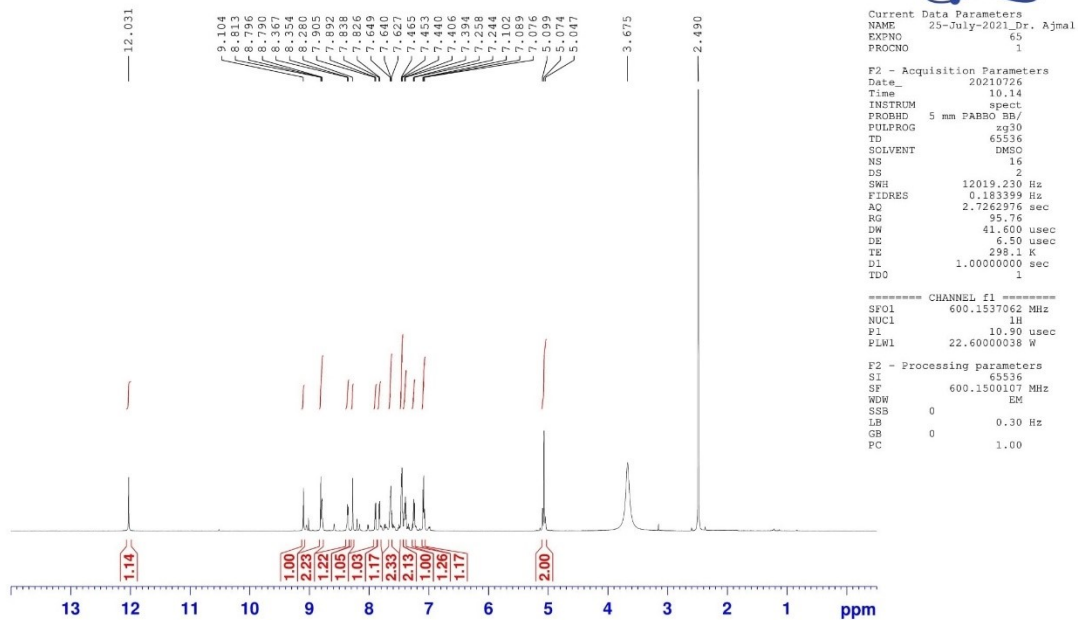

**$^1\text{H}$ -NMR and  $^{13}\text{C}$ -NMR Spectra of 7e**

Dr. Ajmal/Bu-8/DMSO  
C13CPD

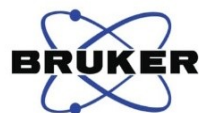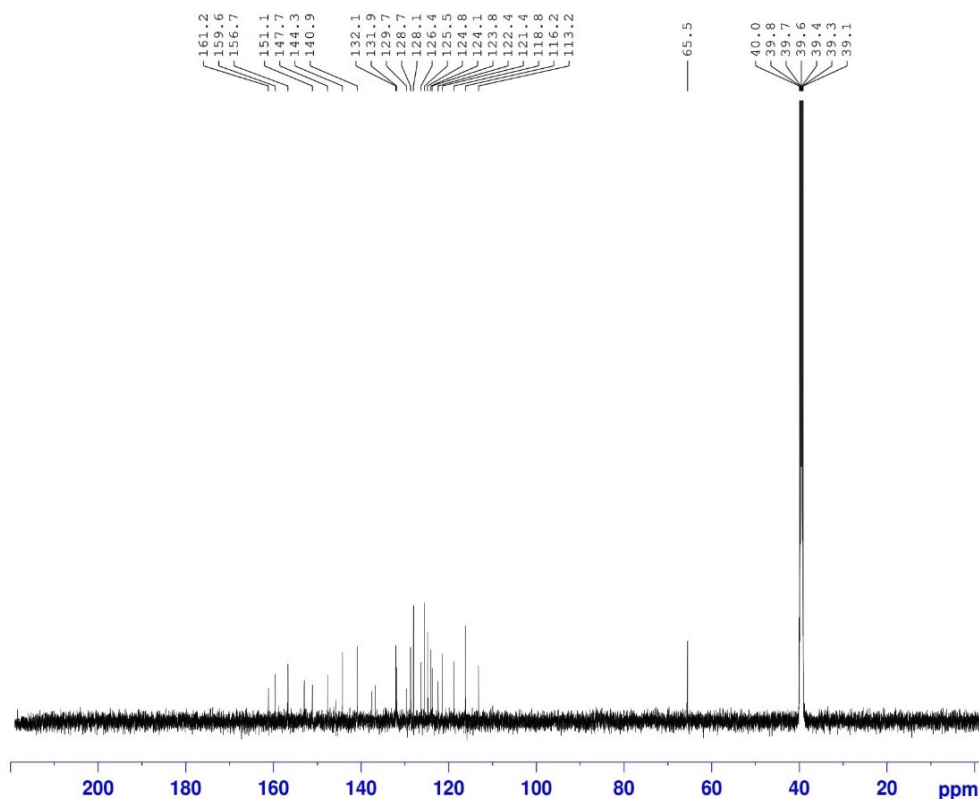

Current Data Parameters  
NAME 25-July-2021-Dr. Ajmal  
EXPNO 66  
PROCNO 1

F2 - Acquisition Parameters  
Date\_ 20210726  
Time 10.21  
INSTRUM spect  
PROBHD 5 mm PABBO BB/  
PULPROG zgpg30  
TD 32768  
SOLVENT DMSO  
NS 1024  
DS 4  
SWH 36057.691 Hz  
FIDRES 1.100393 Hz  
AQ 0.4543829 sec  
RG 195.2  
DW 13.867 usec  
DE 6.50 usec  
TE 298.2 K  
D1 2.00000000 sec  
D11 0.03000000 sec  
TD0 1

===== CHANNEL f1 =====  
SF01 150.9229276 MHz  
NUC1 13C  
P1 11.60 usec  
PLW1 83.00000000 W

===== CHANNEL f2 =====  
SF02 600.1524006 MHz  
NUC2 1H  
CPDPRG2 waltz16  
PCPD2 70.00 usec  
PLW2 22.60000038 W  
PLW12 0.52806002 W  
PLW13 0.25874999 W

F2 - Processing parameters  
SI 32768  
SF 150.9079041 MHz  
WDW EM  
SSB 0  
LB 1.00 Hz  
GB 0  
PC 1.40

## $^1\text{H}$ -NMR and $^{13}\text{C}$ -NMR Spectra of 7f

Dr. Ajmal/Bu-11/DMSO  
PROTON

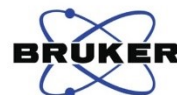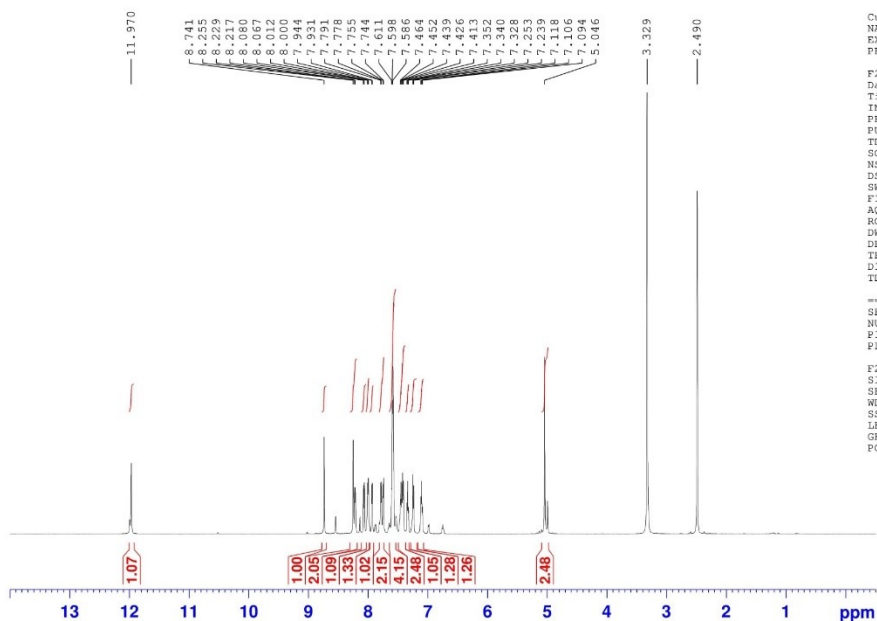

Current Data Parameters  
NAME 25-July-2021-Dr. Ajmal  
EXPNO 77  
PROCNO 1

F2 - Acquisition Parameters  
Date\_ 20210726  
Time 13.20  
INSTRUM spect  
PROBHD 5 mm PABBO BB/  
PULPROG zg30  
TD 65536  
SOLVENT DMSO  
NS 16  
DS 2  
SWH 12019.230 Hz  
FIDRES 0.183399 Hz  
AQ 2.7262976 sec  
RG 70.11  
DW 41.600 usec  
DE 6.50 usec  
TE 298.2 K  
D1 1.00000000 sec  
TD0 1

===== CHANNEL f1 =====  
SF01 600.1537062 MHz  
NUC1 1H  
P1 10.90 usec  
PLW1 22.60000038 W

F2 - Processing parameters  
SI 65536  
SF 600.1500107 MHz  
WDW EM  
SSB 0  
LB 0.30 Hz  
GB 0  
PC 1.00

Dr. Ajmal/Bu-11/DMSO  
C13CPD

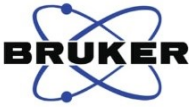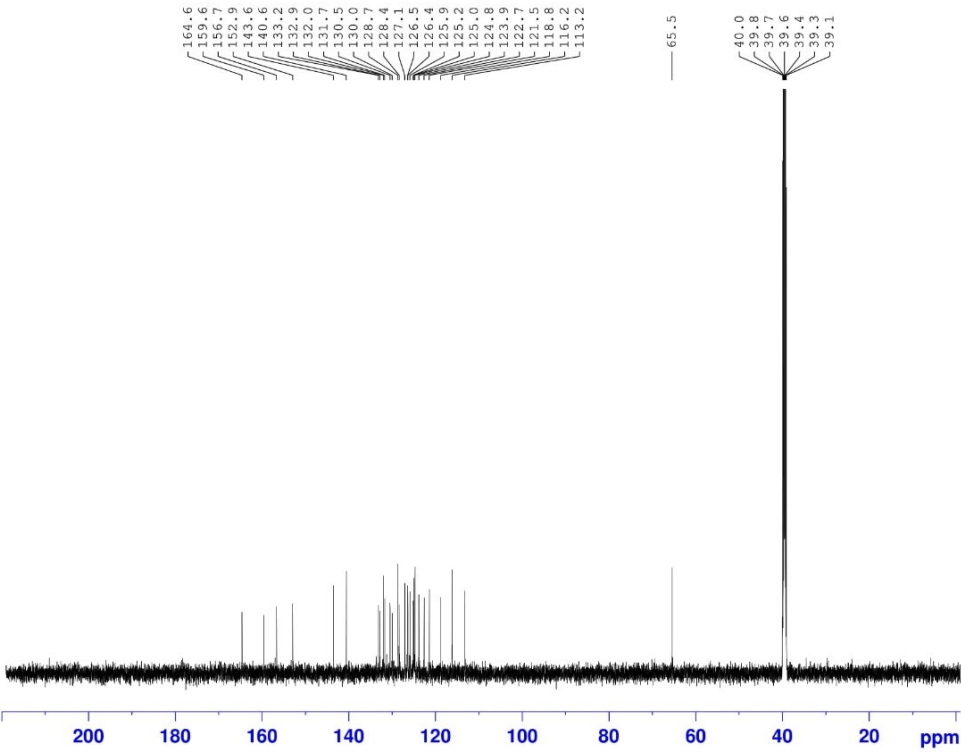

Current Data Parameters  
NAME 25-July-2021\_Dr. Ajmal  
EXPNO 78  
PROCNO 1

F2 - Acquisition Parameters  
Date\_ 20210726  
Time 13.25  
INSTRUM spect  
PROBHD 5 mm PABBO BB/  
PULPROG zgpg30  
TD 32768  
SOLVENT DMSO  
NS 271  
DS 4  
SWH 36057.691 Hz  
FIDRES 1.100393 Hz  
AQ 0.4543829 sec  
RG 195.2  
DW 13.867 usec  
DE 6.50 usec  
TE 298.2 K  
D1 2.00000000 sec  
D11 0.03000000 sec  
TD0 1

===== CHANNEL f1 =====  
SFO1 150.9229276 MHz  
NUC1 13C  
P1 11.60 usec  
PLW1 83.00000000 W

===== CHANNEL f2 =====  
SFO2 600.1524006 MHz  
NUC2 1H  
CPDPRG[2] waltz16  
PCPD2 70.00 usec  
PLW2 22.60000038 W  
PLW12 0.52806002 W  
PLW13 0.25874999 W

F2 - Processing parameters  
SI 32768  
SF 150.9079041 MHz  
WDW EM  
SSB 0  
LB 1.00 Hz  
GB 0  
FC 1.40

**<sup>1</sup>H-NMR and <sup>13</sup>C-NMR Spectra of 7g**

Dr. Ajmal/Bu-12/DMSO  
PROTON

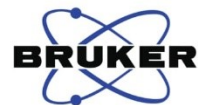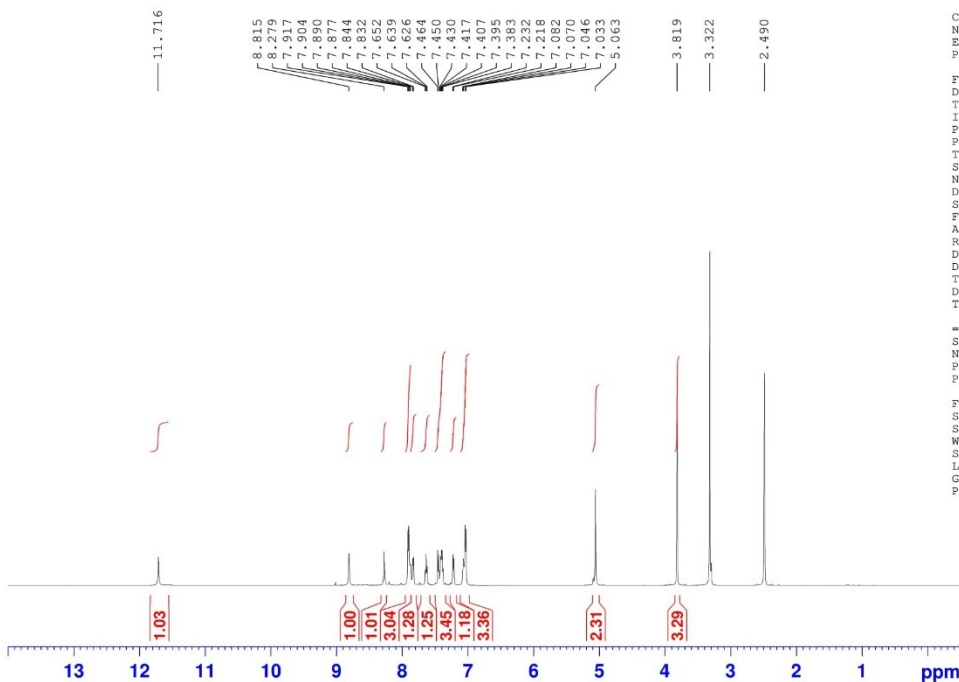

Current Data Parameters  
NAME 25-July-2021 Dr. Ajmal  
EXPNO 81  
PROCNO 1

F2 - Acquisition Parameters  
Date\_ 20210726  
Time 13.42  
INSTRUM spect  
PROBHD 5 mm PABBO BB/  
PULPROG zg30  
TD 65536  
SOLVENT DMSO  
NS 16  
DS 2  
SWH 12019.230 Hz  
FIDRES 0.183399 Hz  
AQ 2.7262976 sec  
RG 76.79  
DW 41.600 usec  
DE 6.50 usec  
TE 298.2 K  
D1 1.00000000 sec  
TD0 1

===== CHANNEL f1 =====  
SFO1 600.1537062 MHz  
NUC1 1H  
P1 10.90 usec  
PLW1 22.60000038 W

F2 - Processing parameters  
SI 65536  
SF 600.1500107 MHz  
WDW EM  
SSB 0  
LB 0.30 Hz  
GB 0  
PC 1.00

Dr. Ajmal/Bu-12/DMSO  
C13CPD

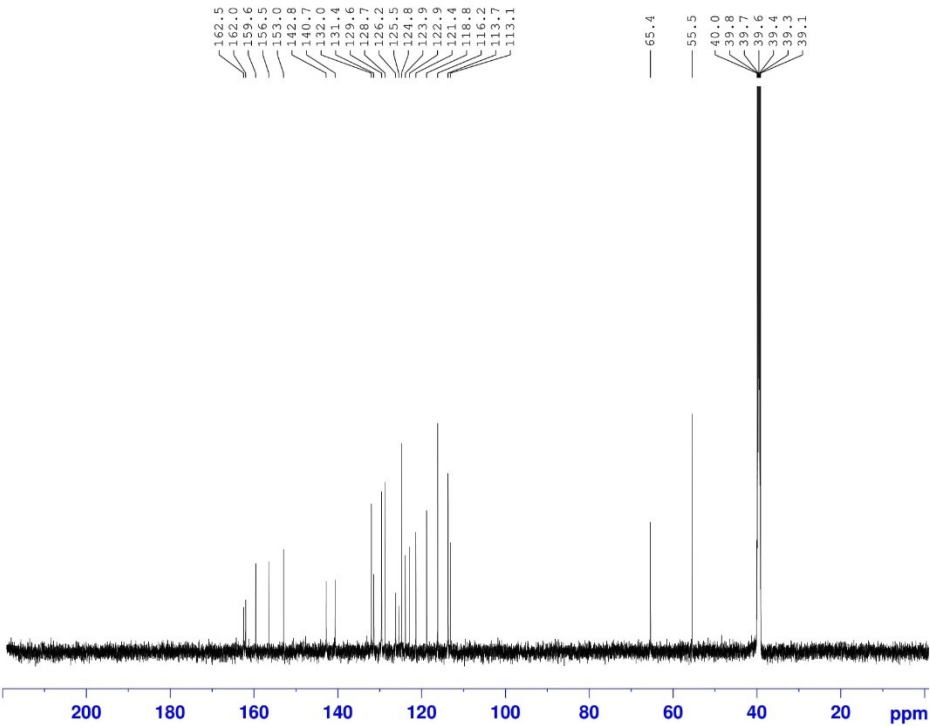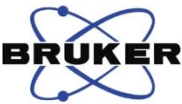

Current Data Parameters  
NAME 23-July-2021 Dr. Ajmal  
EXPNO 82  
PROCNO 1

F2 - Acquisition Parameters  
Date\_ 20210726  
Time 14.26  
INSTRUM spect  
PROBHD 5 mm PABBO BB/  
PULPROG zgpg30  
TD 32768  
SOLVENT DMSO  
NS 1024  
DS 4  
SWH 36057.691 Hz  
FIDRES 1.100393 Hz  
AQ 0.4543829 sec  
RG 195.2  
DW 13.867 usec  
DE 6.50 usec  
TE 298.2 K  
D1 2.00000000 sec  
D11 0.03000000 sec  
TD0 1

===== CHANNEL f1 =====  
SF01 150.9229276 MHz  
NUC1 13C  
P1 11.60 usec  
PLW1 83.00000000 W

===== CHANNEL f2 =====  
SF02 600.1524006 MHz  
NUC2 1H  
CPDPRG2 waltz16  
PCPD2 70.00 usec  
PLW2 22.60000038 W  
PLW12 0.52806002 W  
PLW13 0.25874999 W

F2 - Processing parameters  
SI 32768  
SF 150.9079041 MHz  
WDW EM  
SSB 0  
LB 1.00 Hz  
GB 0  
PC 1.40

# $^1\text{H}$ -NMR and $^{13}\text{C}$ -NMR Spectra of 7h

Dr. Ajmal/Bu-13/DMSO  
PROTON

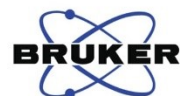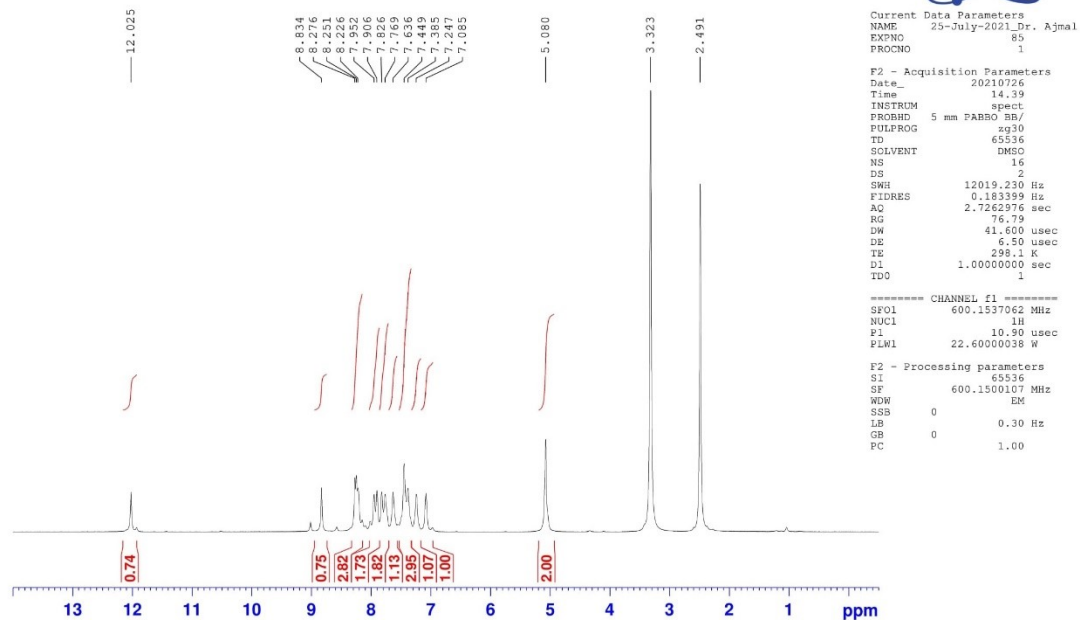



Dr. Ajmal/Bu-13/DMSO  
C13CPD

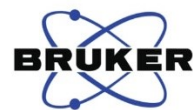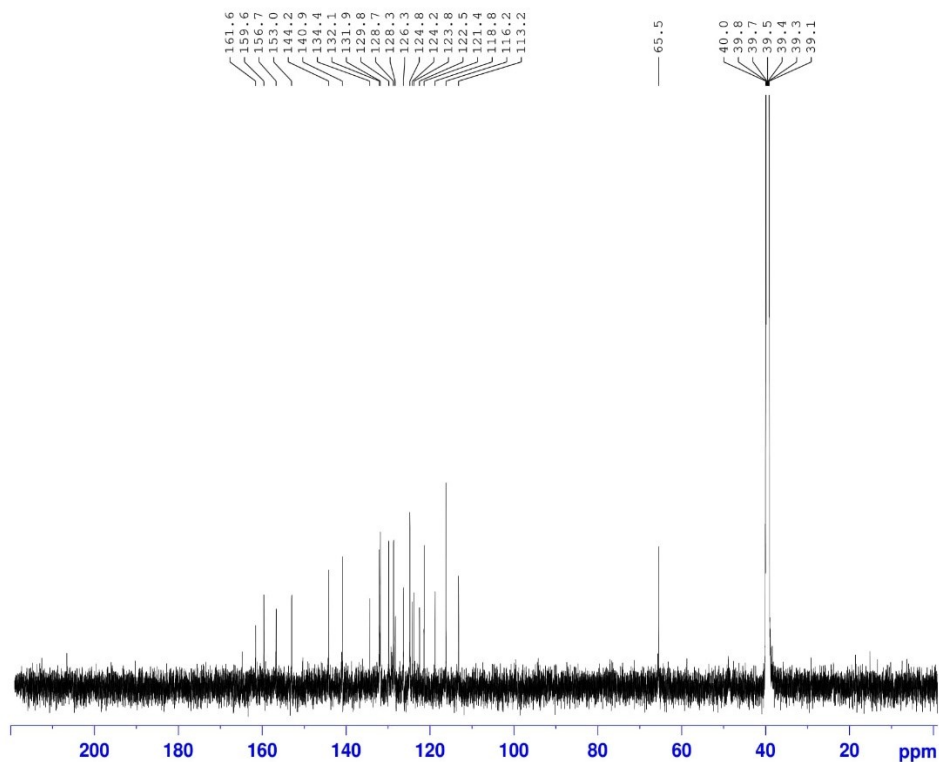

```

Current Data Parameters
NAME      25-July-2021_Dr. Ajmal
EXPNO     86
PROCNO    1

F2 - Acquisition Parameters
Date_     20210726
Time      15.22
INSTRUM   spect
PROBHD    5 mm PABBO BB/
PULPROG   zgpg30
TD         32768
SOLVENT   DMSO
NS         1024
DS         4
SWH        36057.691 Hz
FIDRES     1.100393 Hz
AQ         0.4543829 sec
RG         195.2
DN         13.867 usec
DE         6.50 usec
TE         298.1 K
D1         2.00000000 sec
D11        0.03000000 sec
TD0        1

===== CHANNEL f1 =====
SFO1      150.9229276 MHz
NUC1       13C
P1         11.60 usec
PLW1       83.00000000 W

===== CHANNEL f2 =====
SFO2      600.1524006 MHz
NUC2       1H
CPDPRG[2] waltz16
PCPD2      70.00 usec
PLW2       22.60000038 W
PLW12      0.52805002 W
PLW13      0.25874999 W

F2 - Processing parameters
SI         32768
SF         150.9079041 MHz
WDW        EM
SSB        0
LB         1.00 Hz
GB         0
PC         1.40
  
```

Dr. Ajmal/Bu-14/DMSO  
PROTON

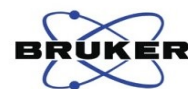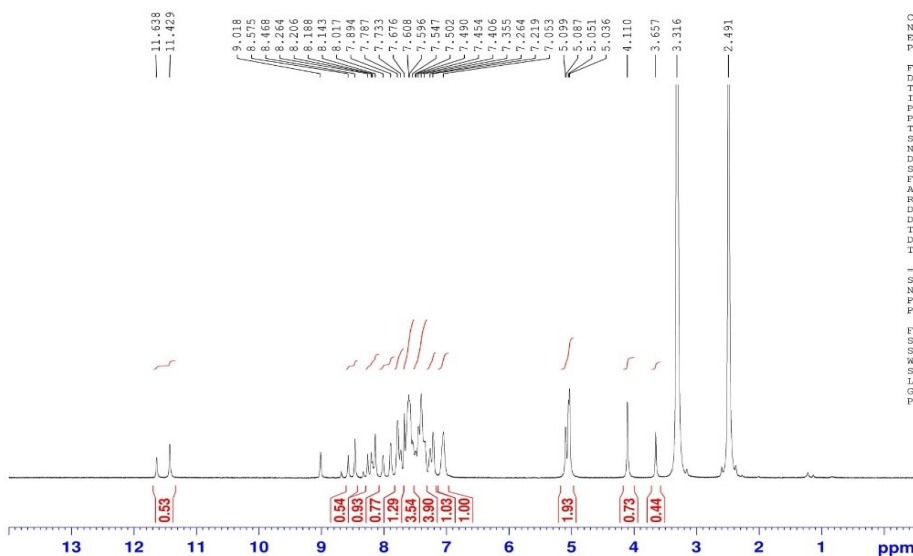

Current Data Parameters  
NAME 25-July-2021.Dr. Ajmal  
EXPNO 69  
PROCNO 1

F2 - Acquisition Parameters  
Date\_ 20210726  
Time 12.38  
INSTRUM spect  
PROBHD 5 mm PABBO BB/  
PULPROG zg30  
TD 65536  
SOLVENT DMSO  
NS 16  
DS 2  
SWH 12019.230 Hz  
FIDRES 0.183339 Hz  
AQ 2.7262976 sec  
RG 76.79  
DW 41.600 usec  
DE 6.50 usec  
TE 298.2 K  
D1 1.00000000 sec  
TD0 1

===== CHANNEL f1 =====  
SFO1 600.1537062 MHz  
NUC1 1H  
P1 10.90 usec  
PLW1 22.60000038 W

F2 - Processing parameters  
SI 65536  
SF 600.1500107 MHz  
WDW EM  
SSB 0  
LB 0.30 Hz  
GB 0  
PC 1.00

## <sup>1</sup>H-NMR and <sup>13</sup>C-NMR Spectra of 7i

Dr. Ajmal / Bu-14 / CDCl<sub>3</sub>  
C13CPD

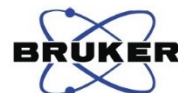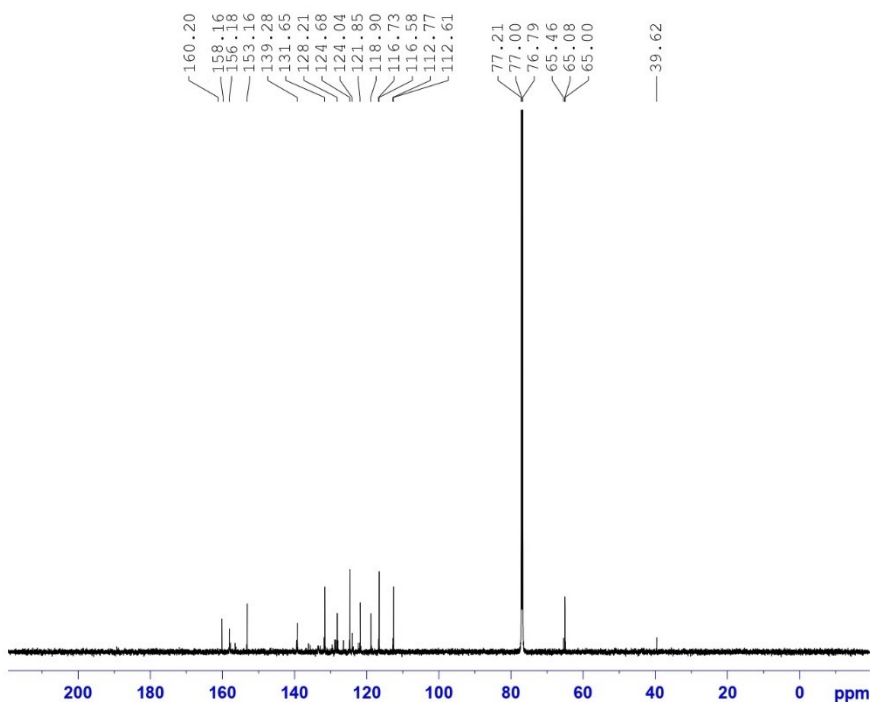

Current Data Parameters  
NAME 17-July-2023  
EXPNO 7  
PROCNO 1

F2 - Acquisition Parameters  
Date\_ 20230717  
Time 11.21  
INSTRUM spect  
PROBHD 5 mm PABBO BB/  
PULPROG zgpg30  
TD 65536  
SOLVENT CDCl<sub>3</sub>  
NS 10240  
DS 4  
SWH 36057.691 Hz  
FIDRES 0.550197 Hz  
AQ 0.9087659 sec  
RG 191.2  
DW 13.867 usec  
DE 6.50 usec  
TE 298.2 K  
D1 2.00000000 sec  
D11 0.03000000 sec  
TD0 1

===== CHANNEL f1 =====  
SFO1 150.9229276 MHz  
NUC1 13C  
P1 11.60 usec  
PLN1 83.00000000 W

===== CHANNEL f2 =====  
SFO2 600.1524006 MHz  
NUC2 1H  
CPDPRG2 waltz16  
PCPD2 70.00 usec  
PLN2 22.60000038 W  
PLN12 0.52806002 W  
PLN13 0.25874999 W

F2 - Processing parameters  
SI 32768  
SF 150.9078399 MHz  
WDW EM  
SSB 0  
LB 1.00 Hz  
GB 0  
PC 1.40

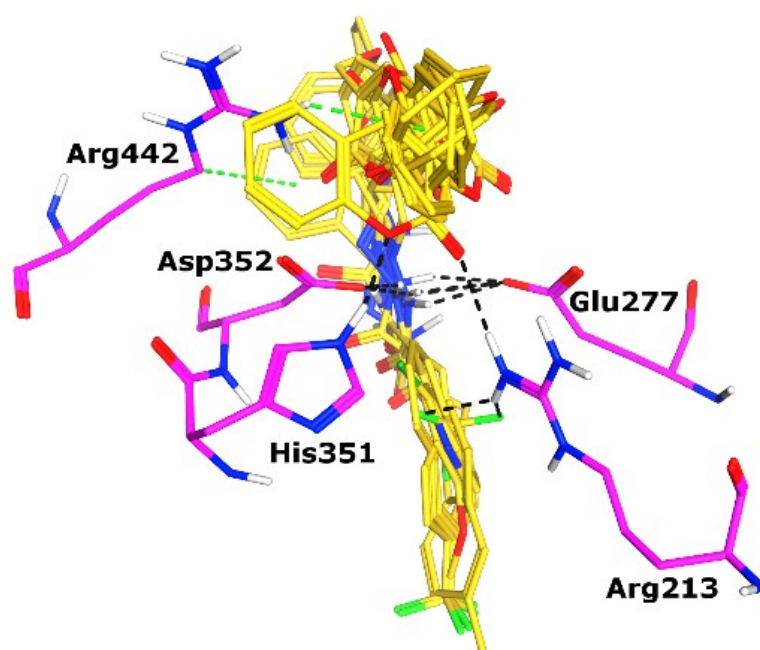

**Figure S1.** The docked conformations of all the compounds (presented in yellow sticks) are shown in the active site of  $\alpha$ -glucosidase. The binding residues in the active site are presented in magenta sticks, H-bonds and hydrophobic bonds are depicted in black and green dotted lines, respectively.
